# Supplementary material
Source: PubMed Central journal article supplement (PMC5712244)

# Supplemental Figure 1

**A**

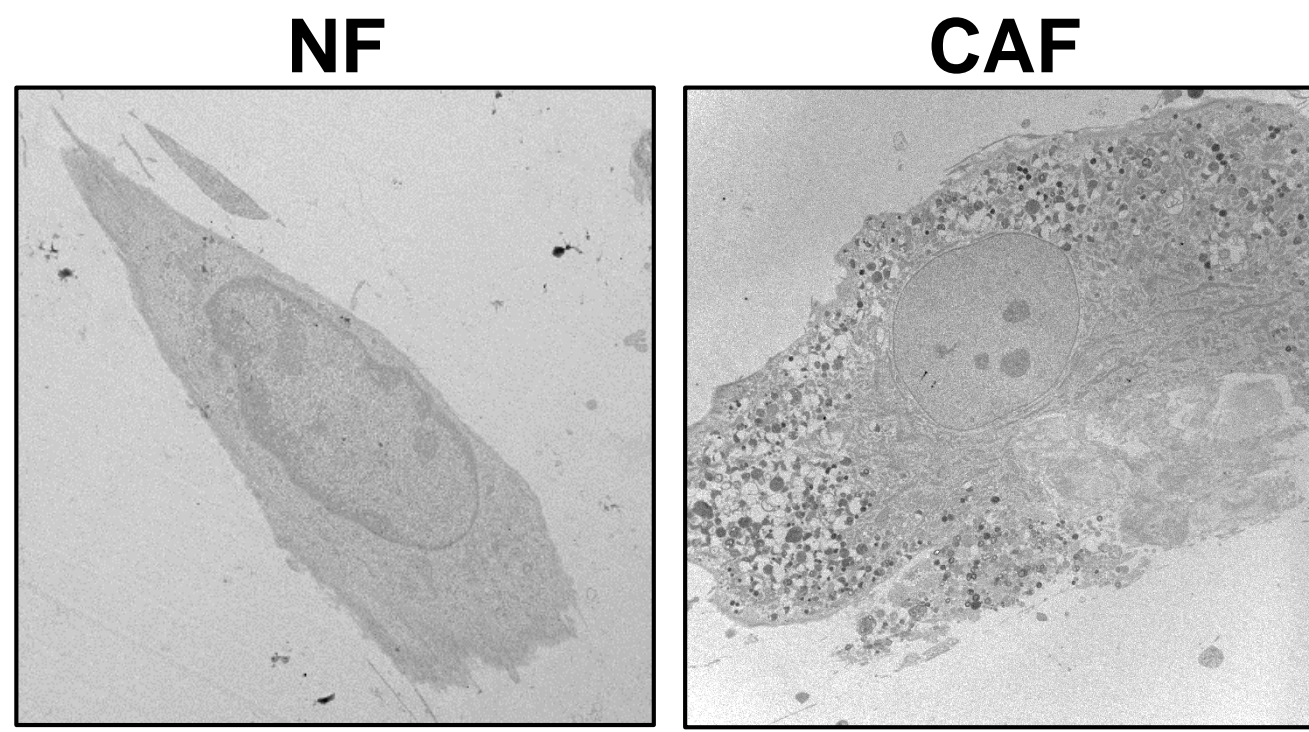

**B**

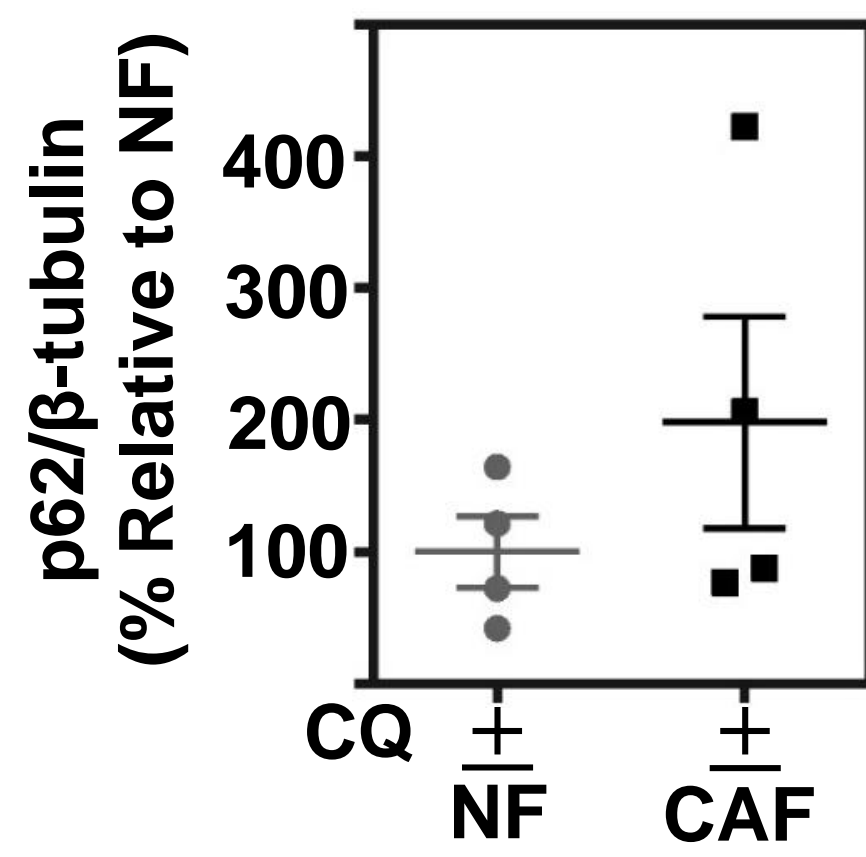

**C**

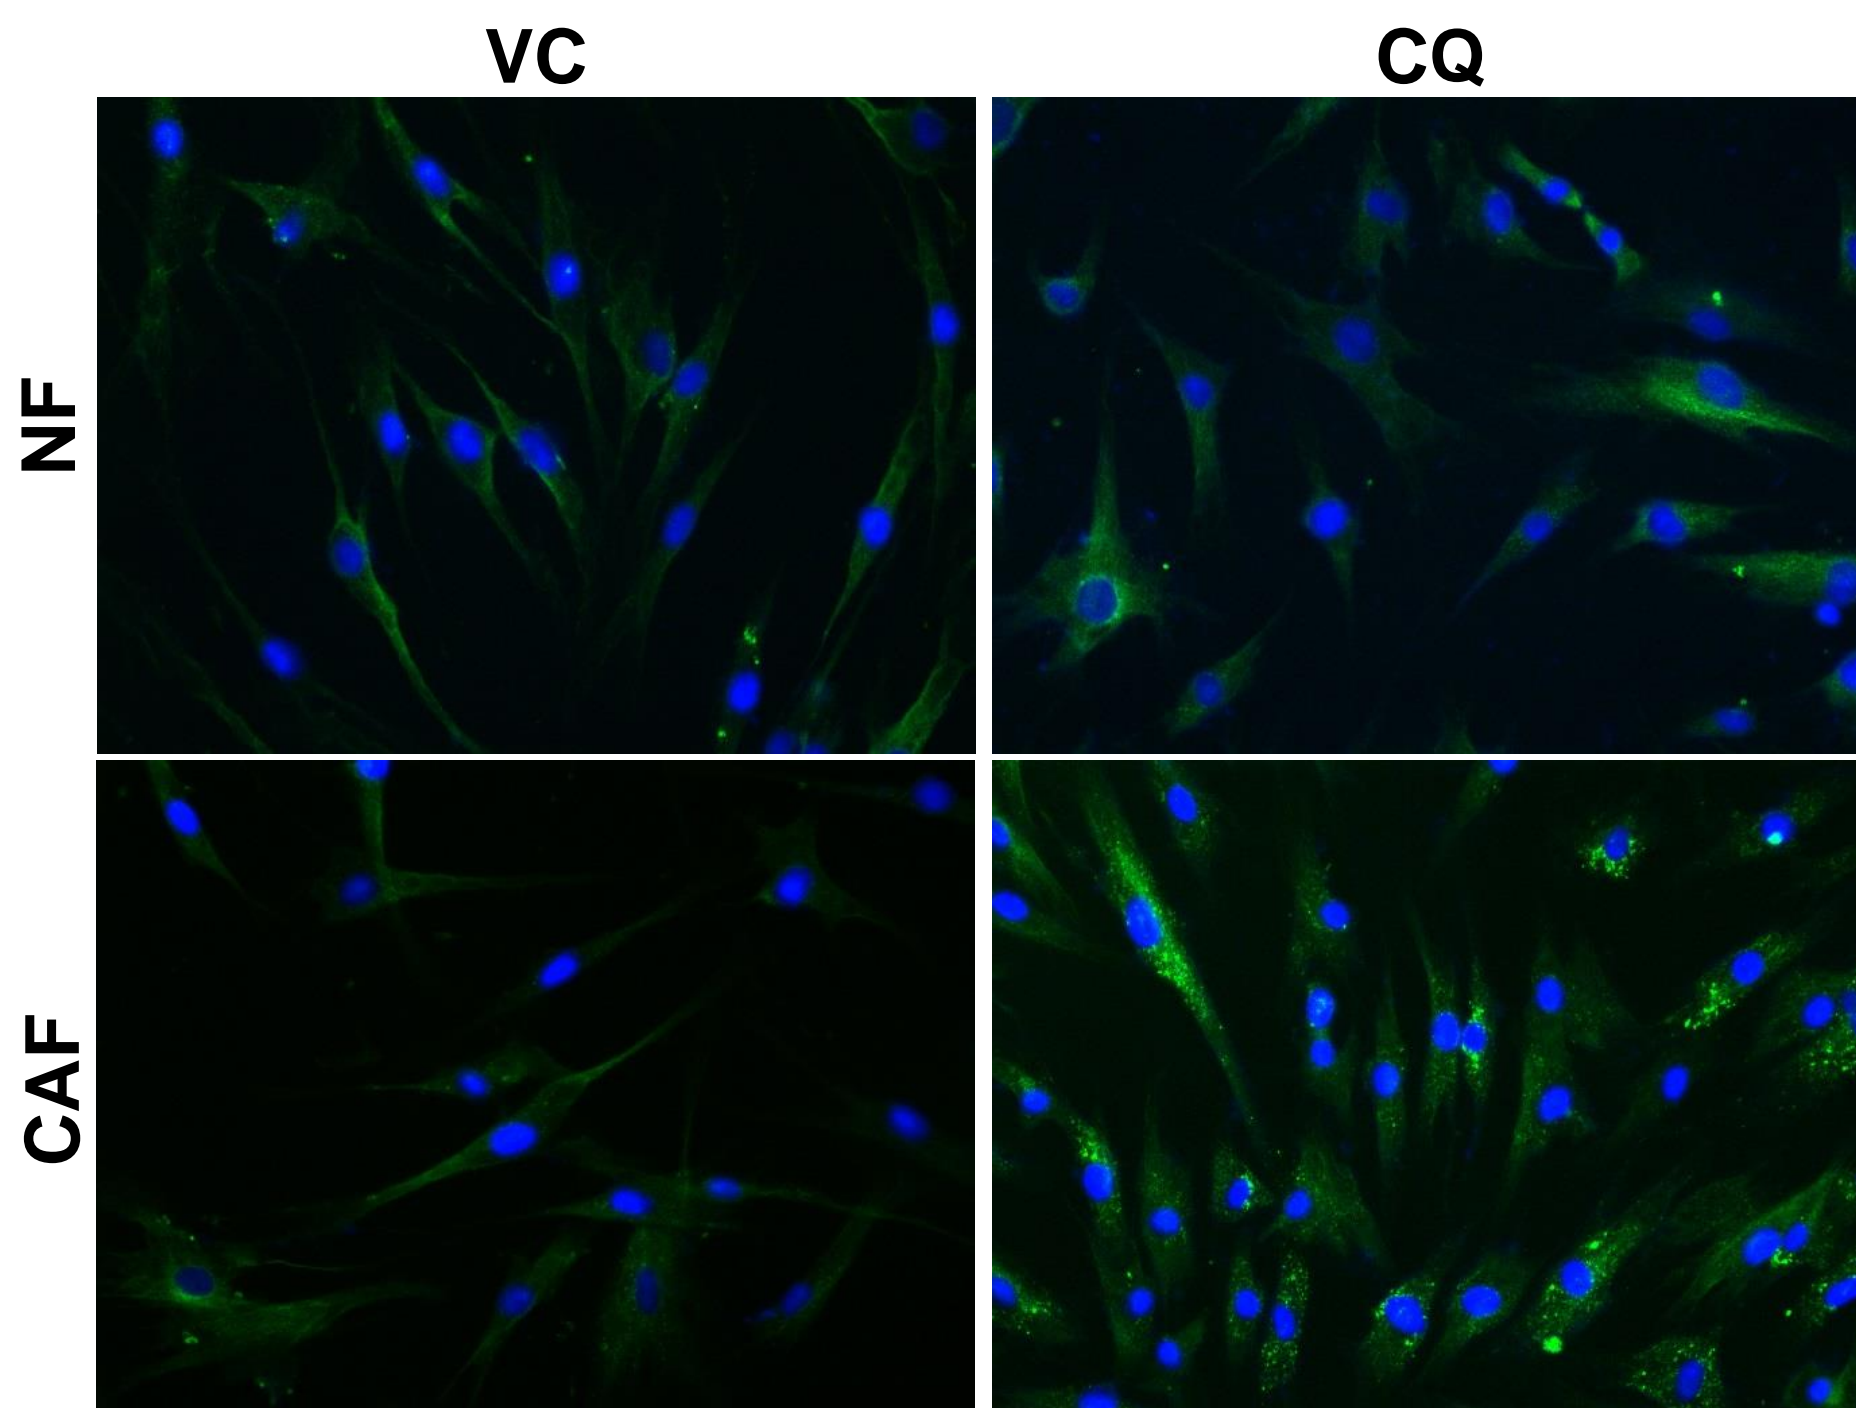

Supplement: NIHMS910161-supplement-2.pdf [file NIHMS910161-supplement-2.pdf]

# Supplemental Figure 2

**A**

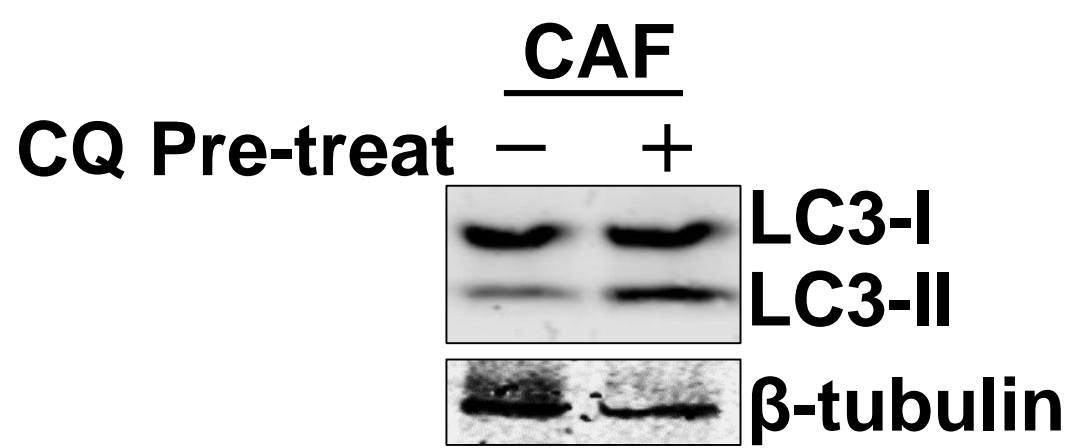

**B**

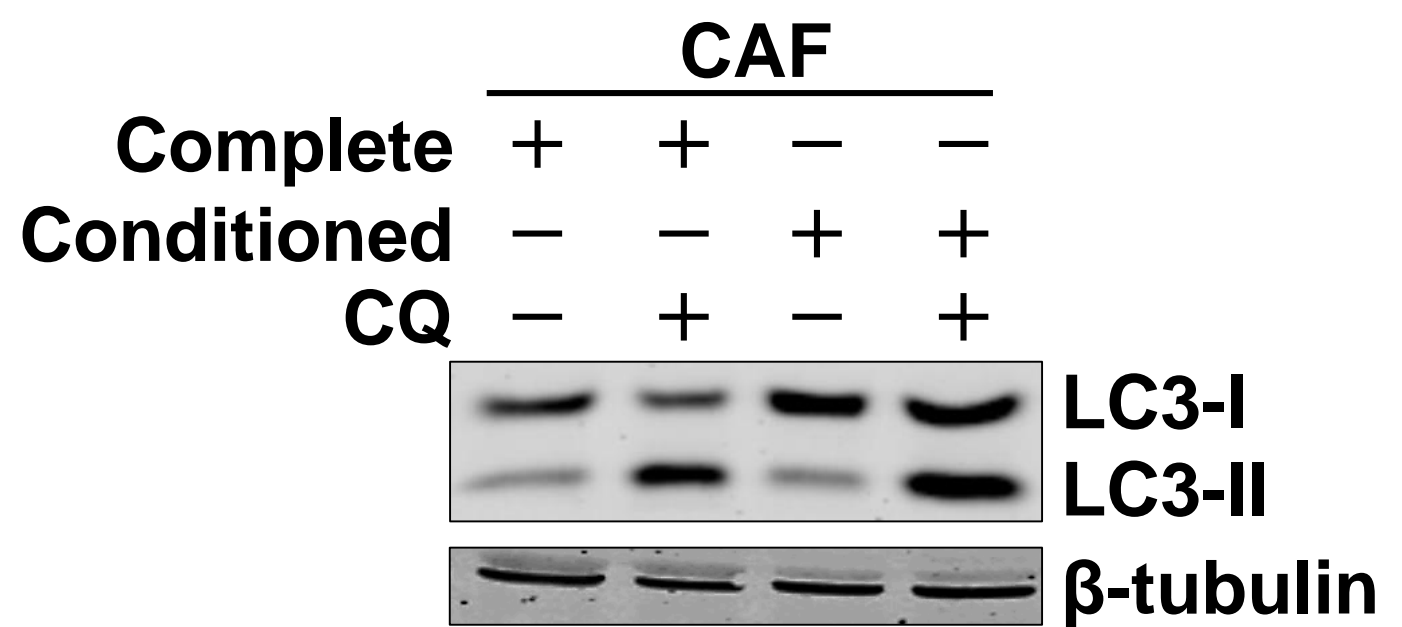

**C**

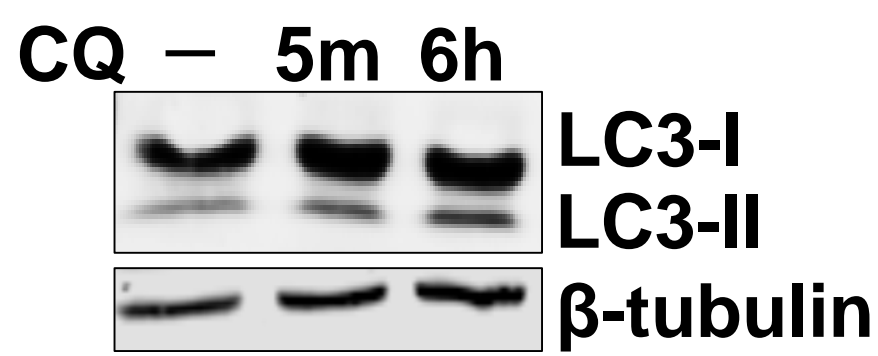

**D**

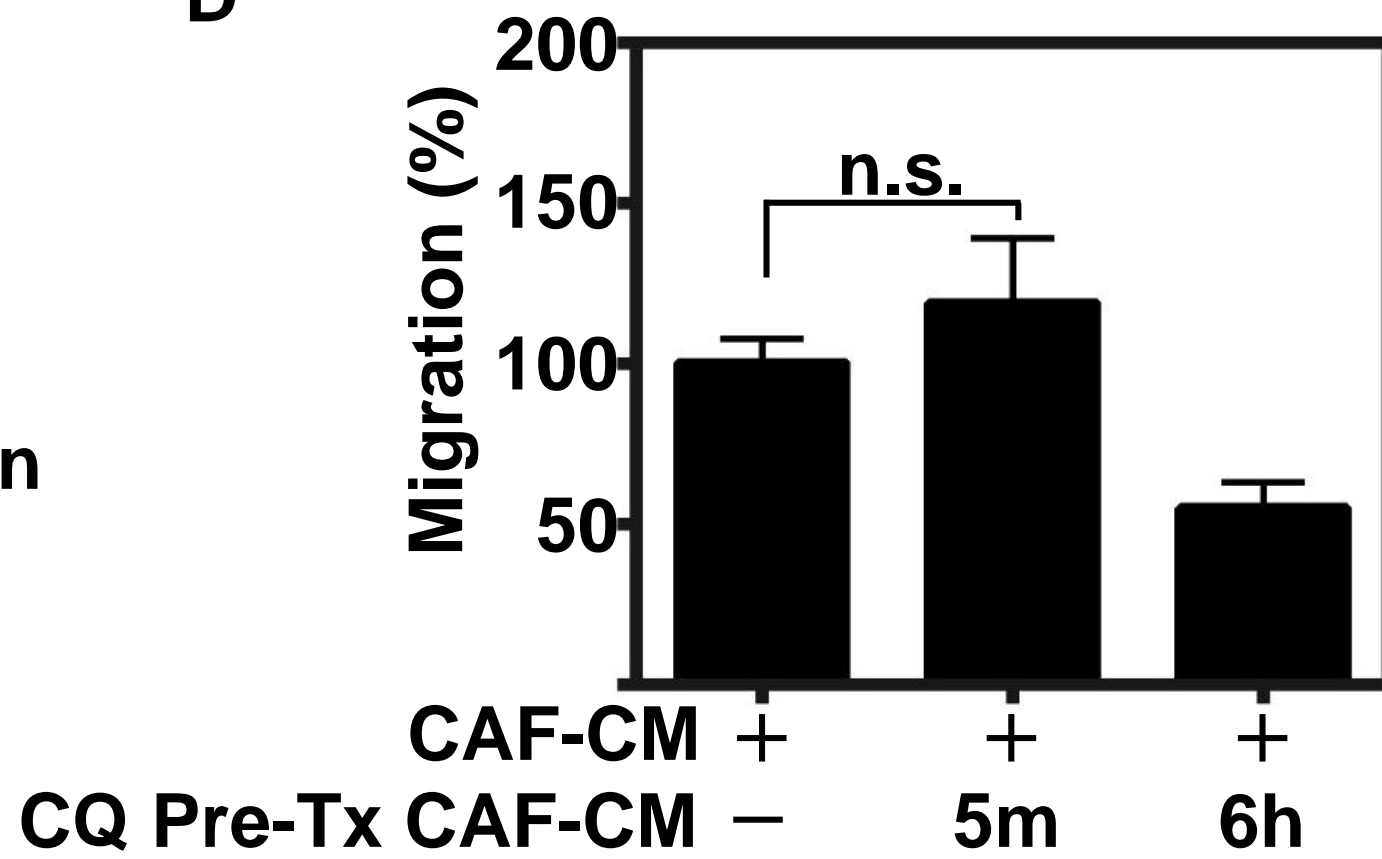

**E**

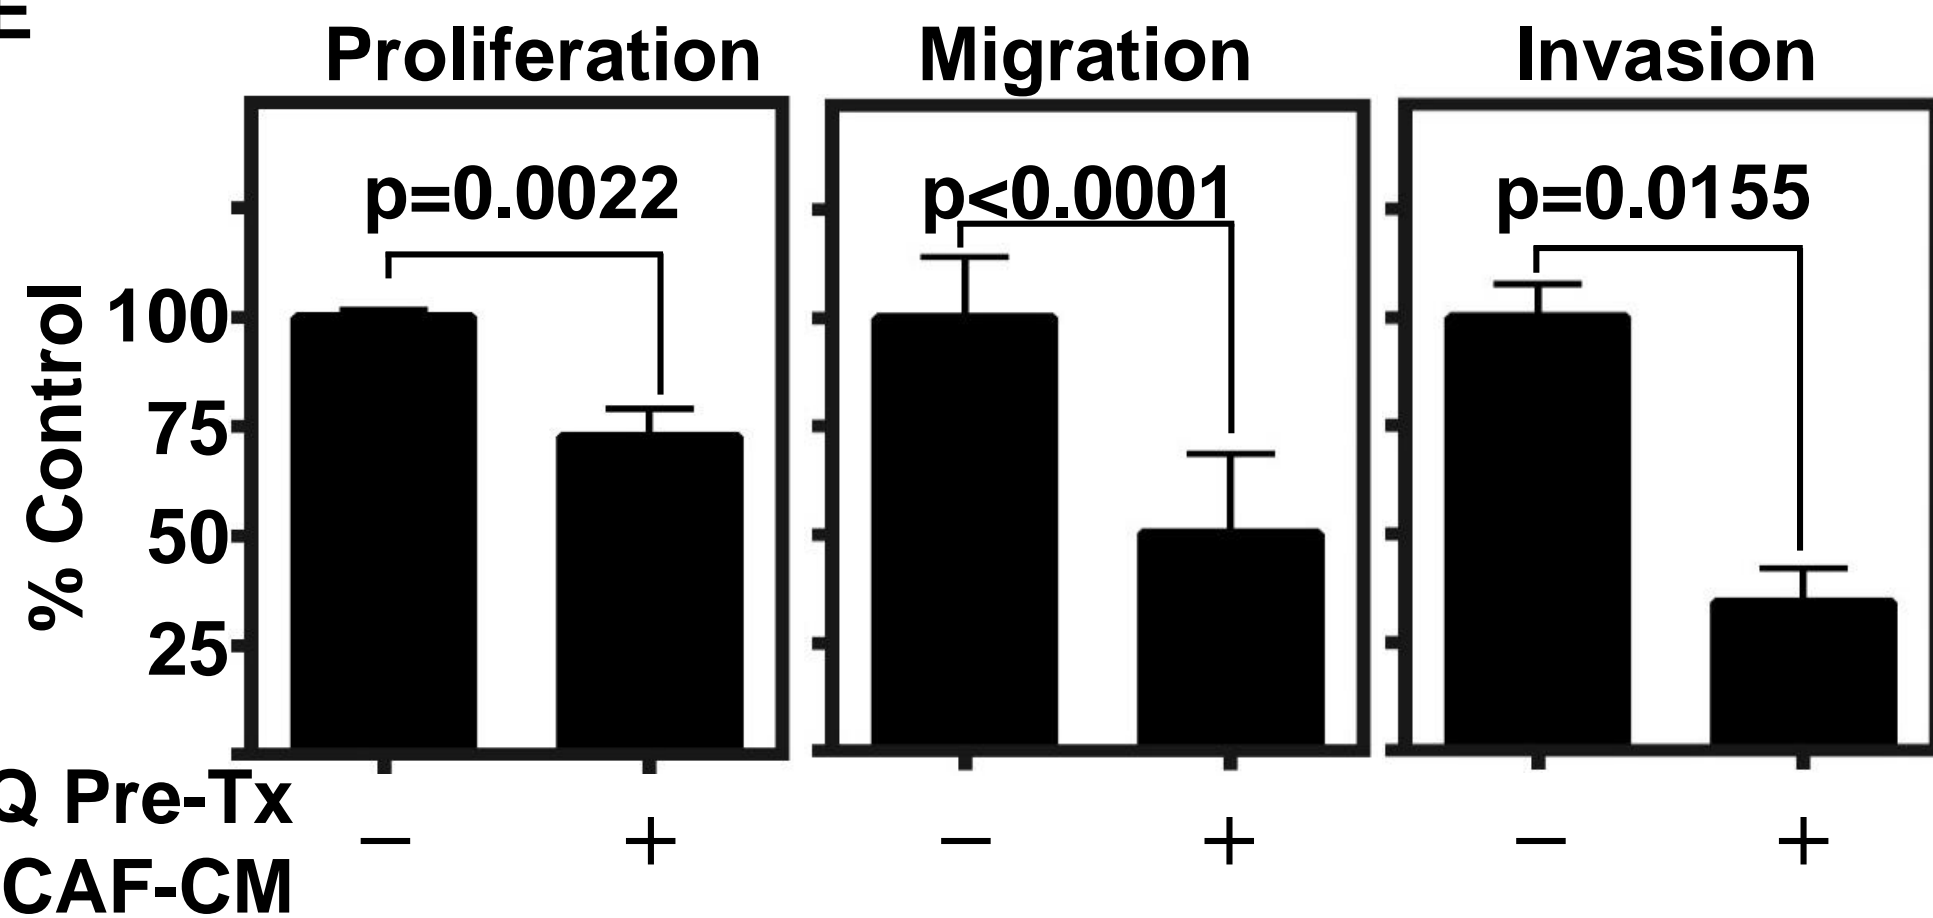

**F**

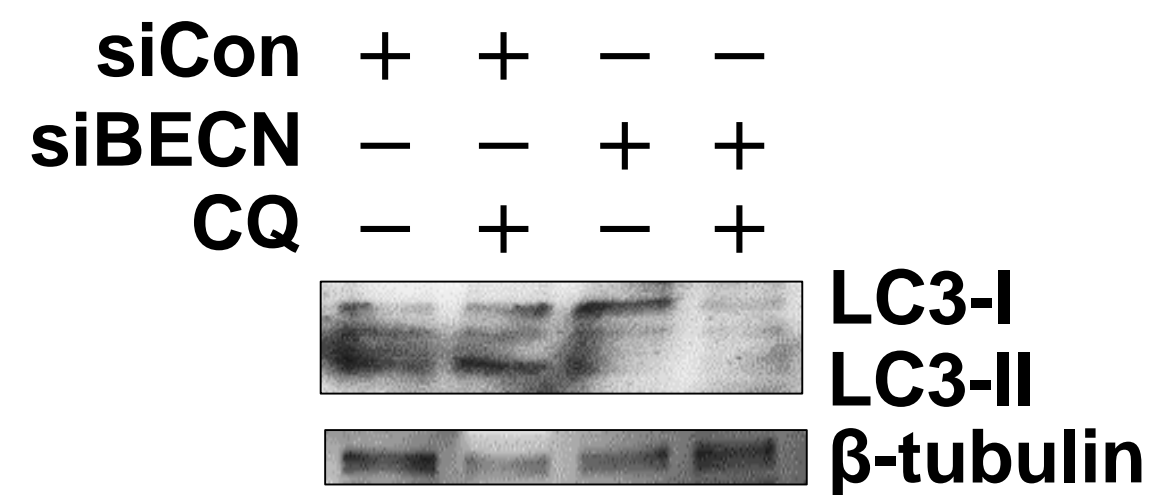

**G**

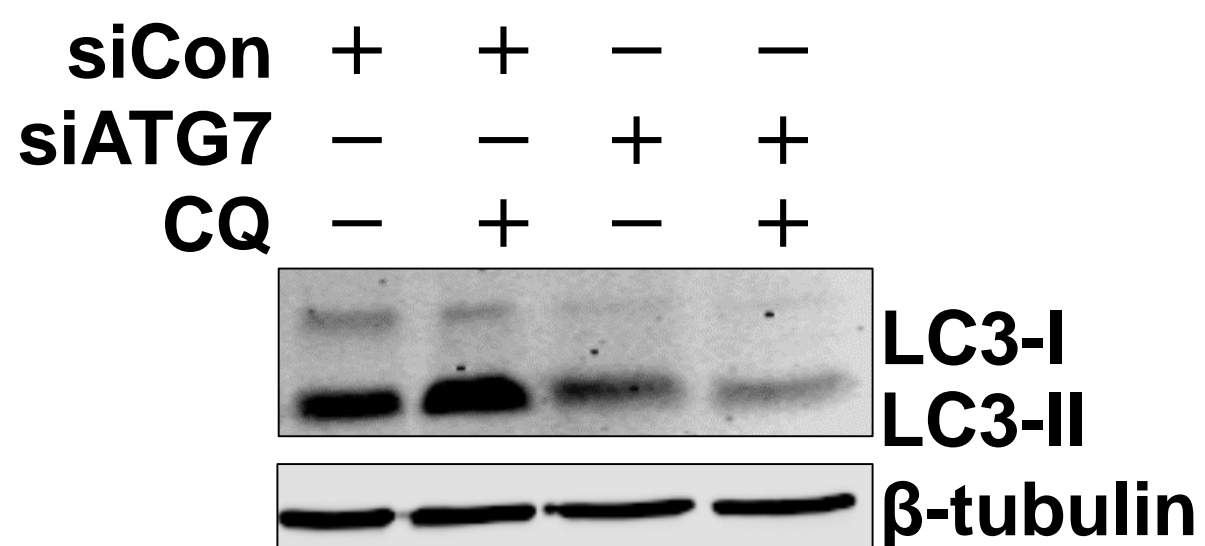

**H**

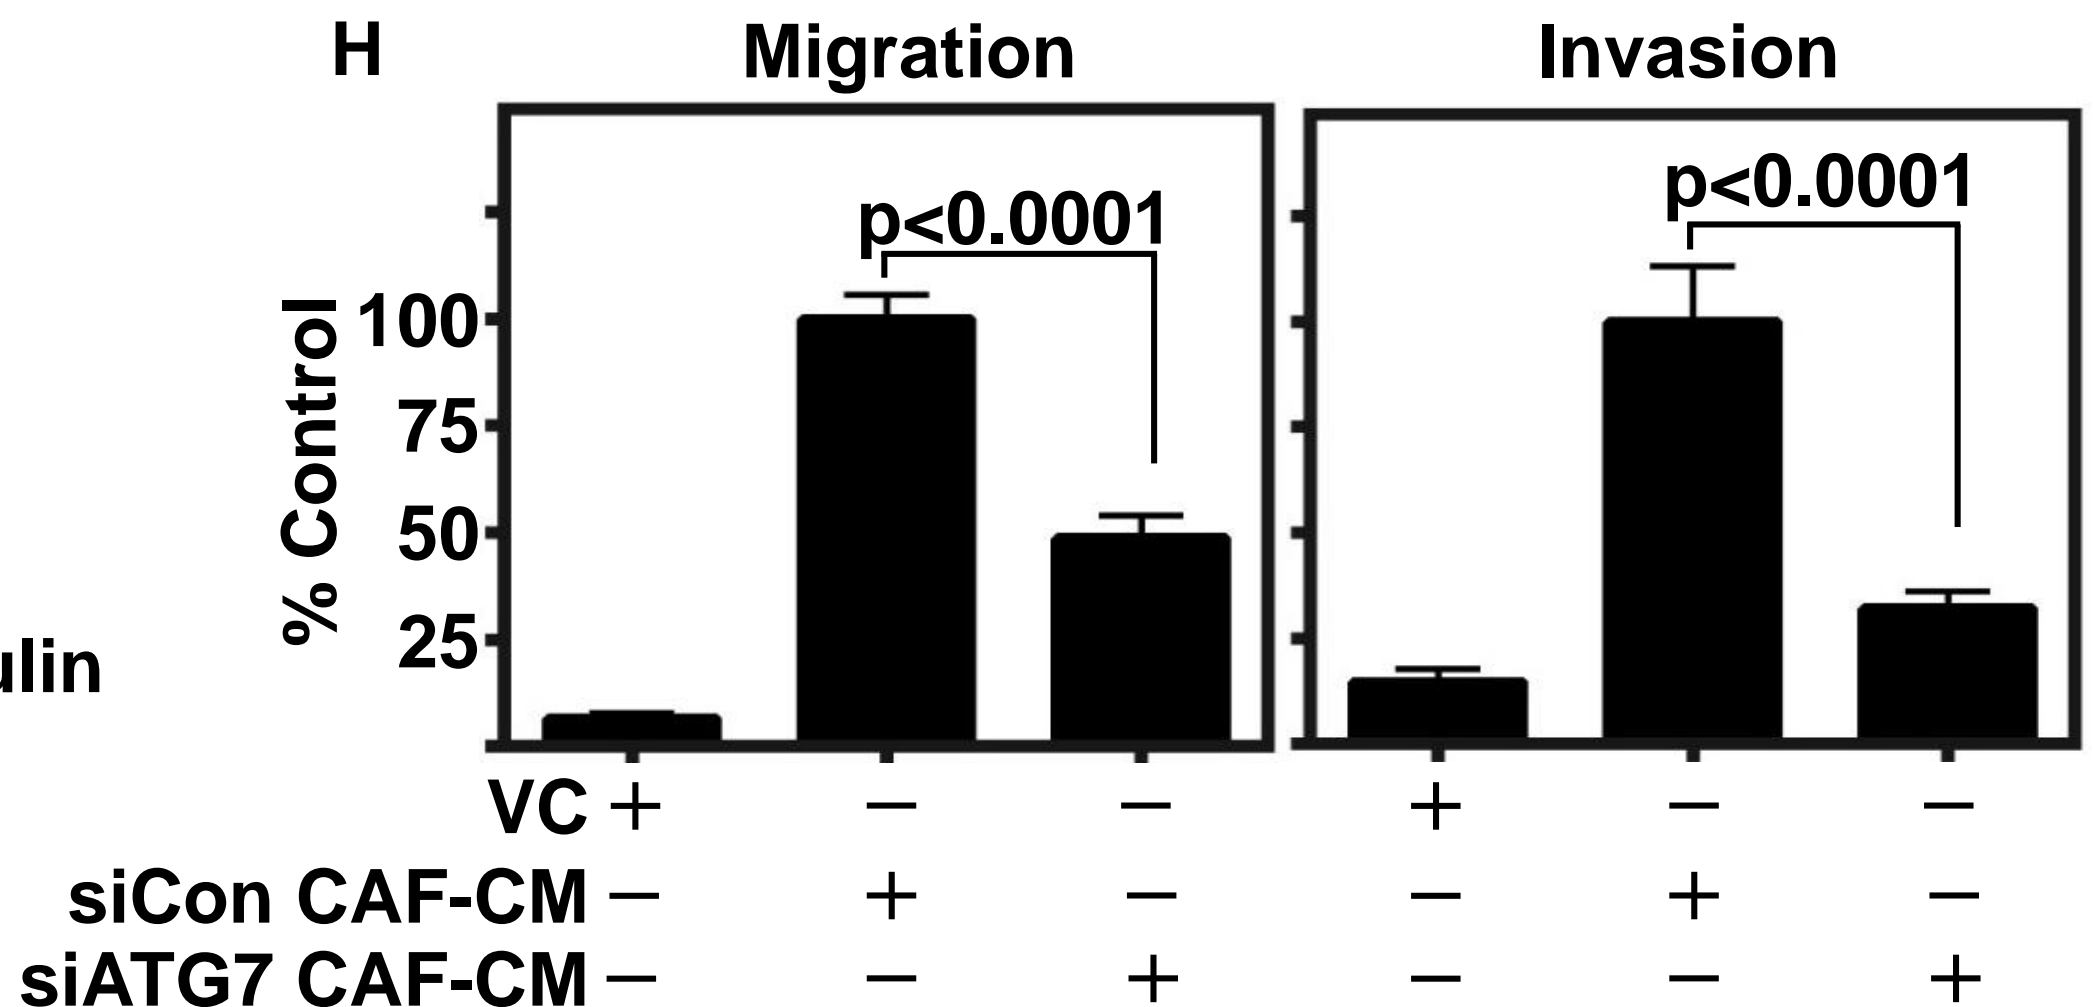

Supplement: NIHMS910161-supplement-3.pdf [file NIHMS910161-supplement-3.pdf]

# Supplemental Figure 3

**A**

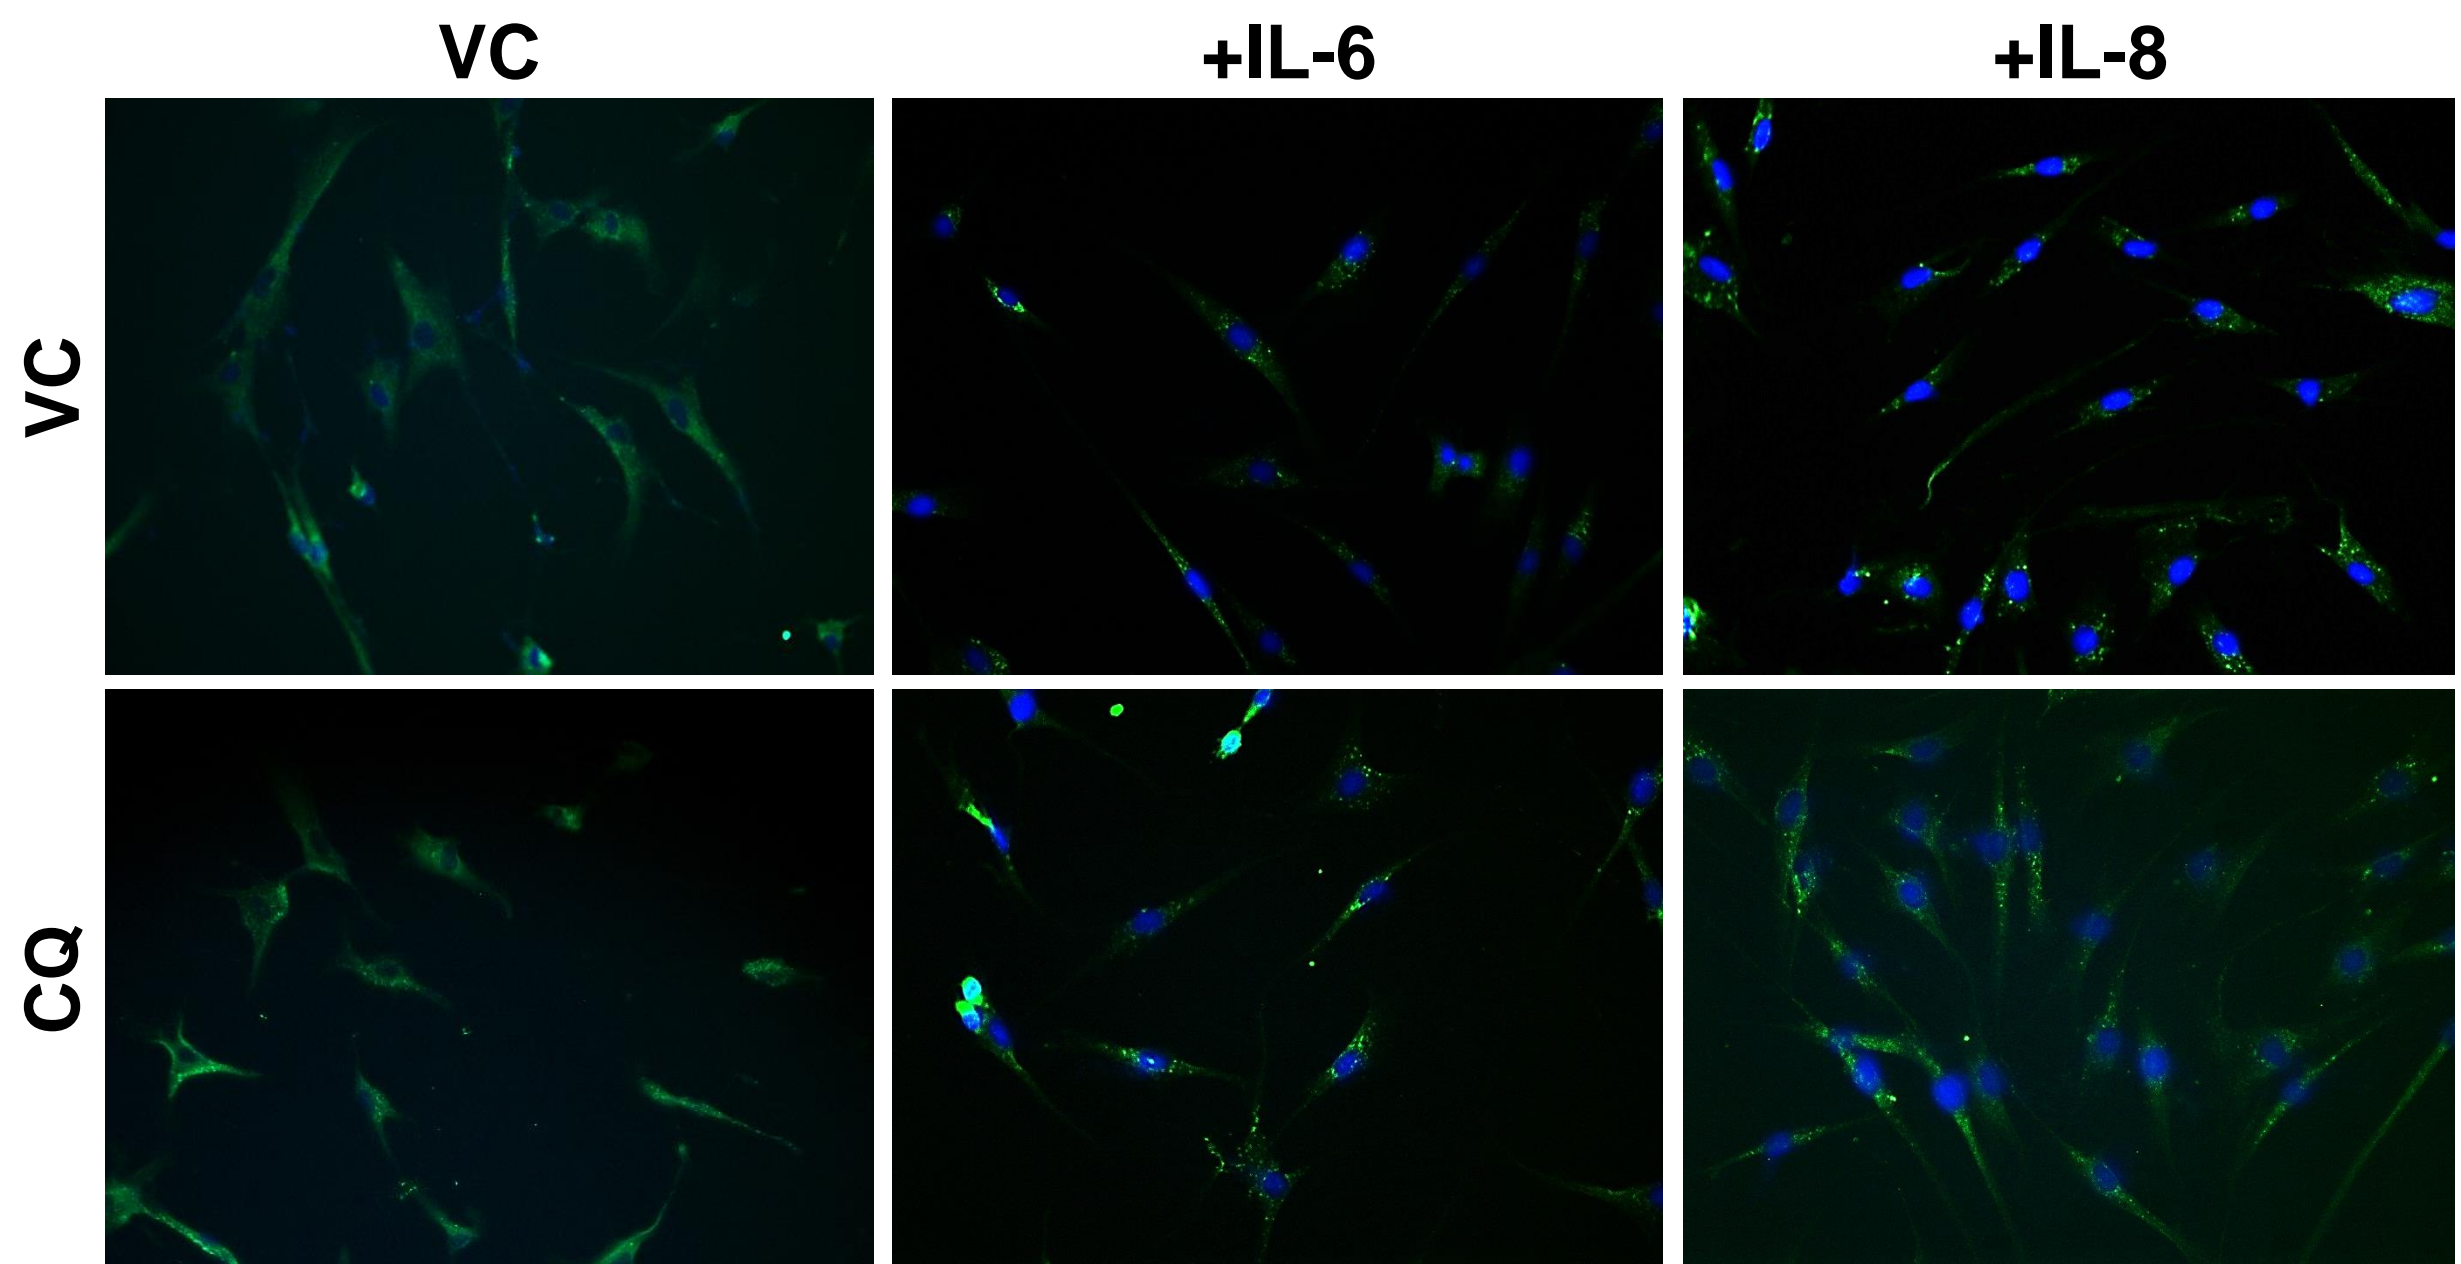

**B**

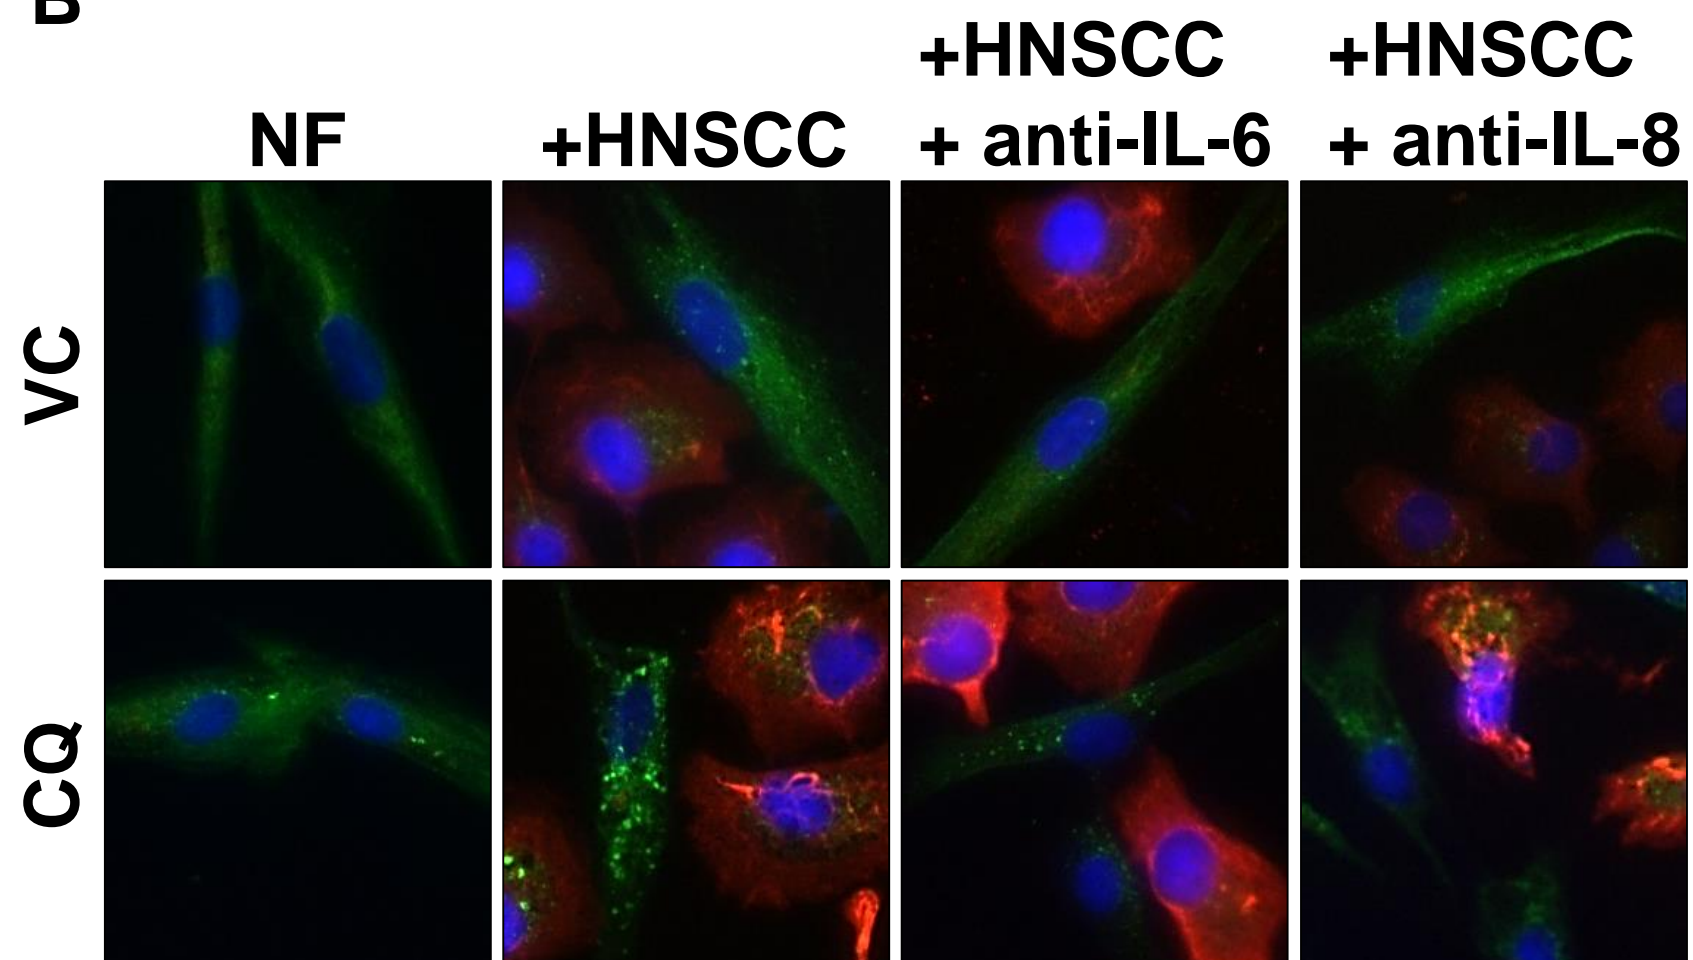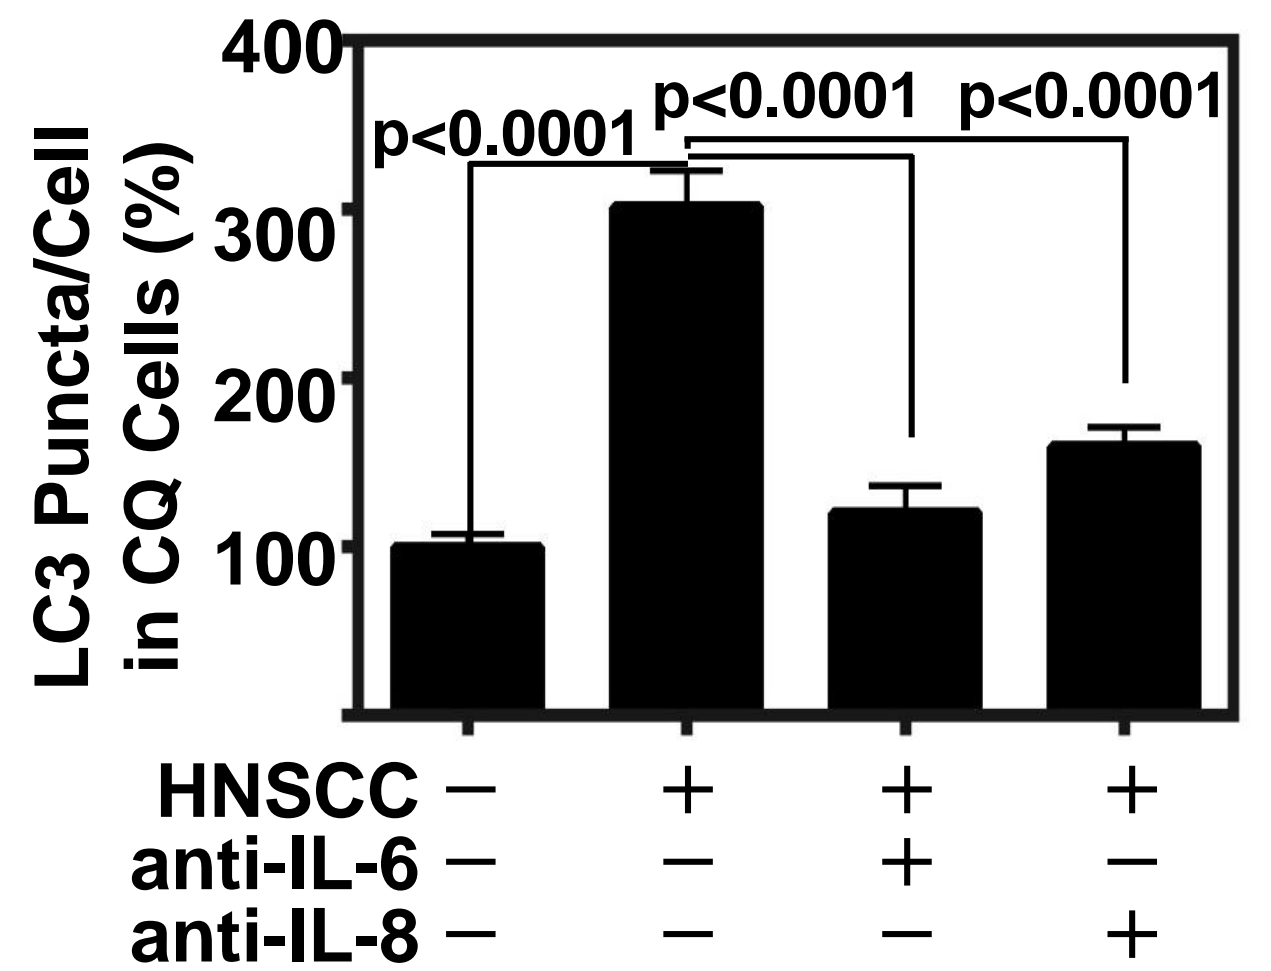

Supplement: NIHMS910161-supplement-4.pdf [file NIHMS910161-supplement-4.pdf]

# Supplemental Figure 4

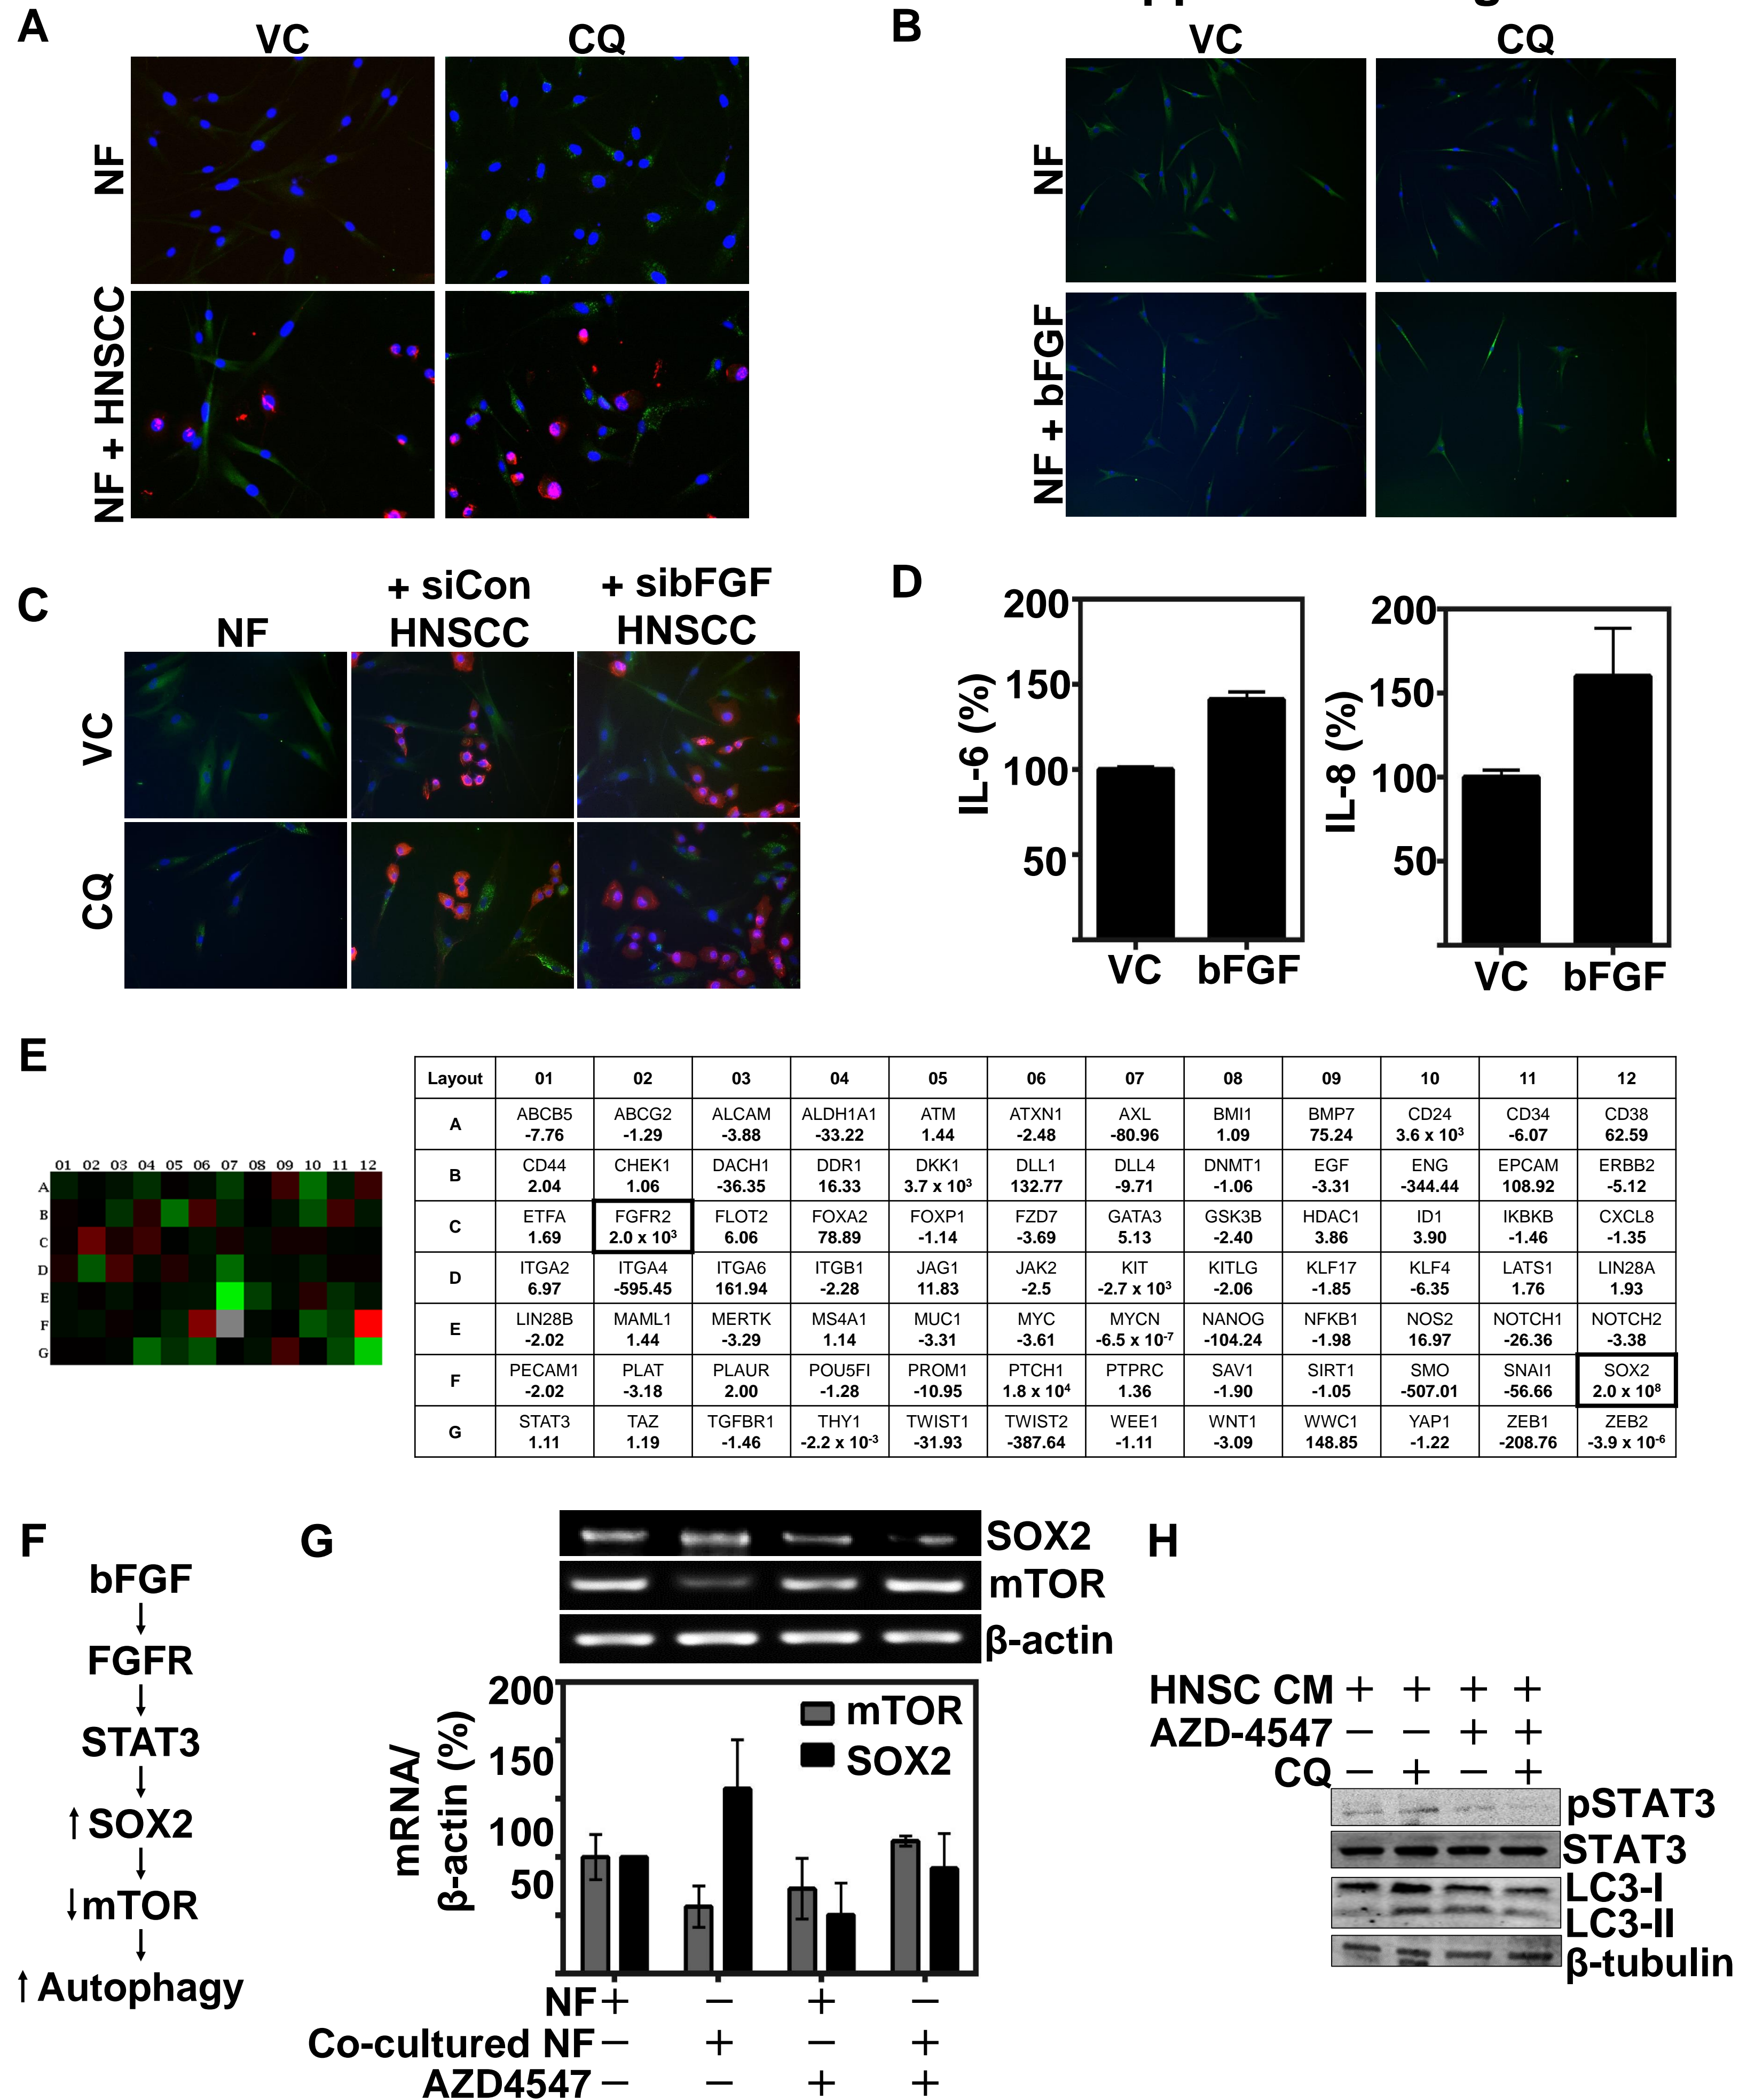

Supplement: NIHMS910161-supplement-5.pdf [file NIHMS910161-supplement-5.pdf]

# Supplemental Figure 5

**A**

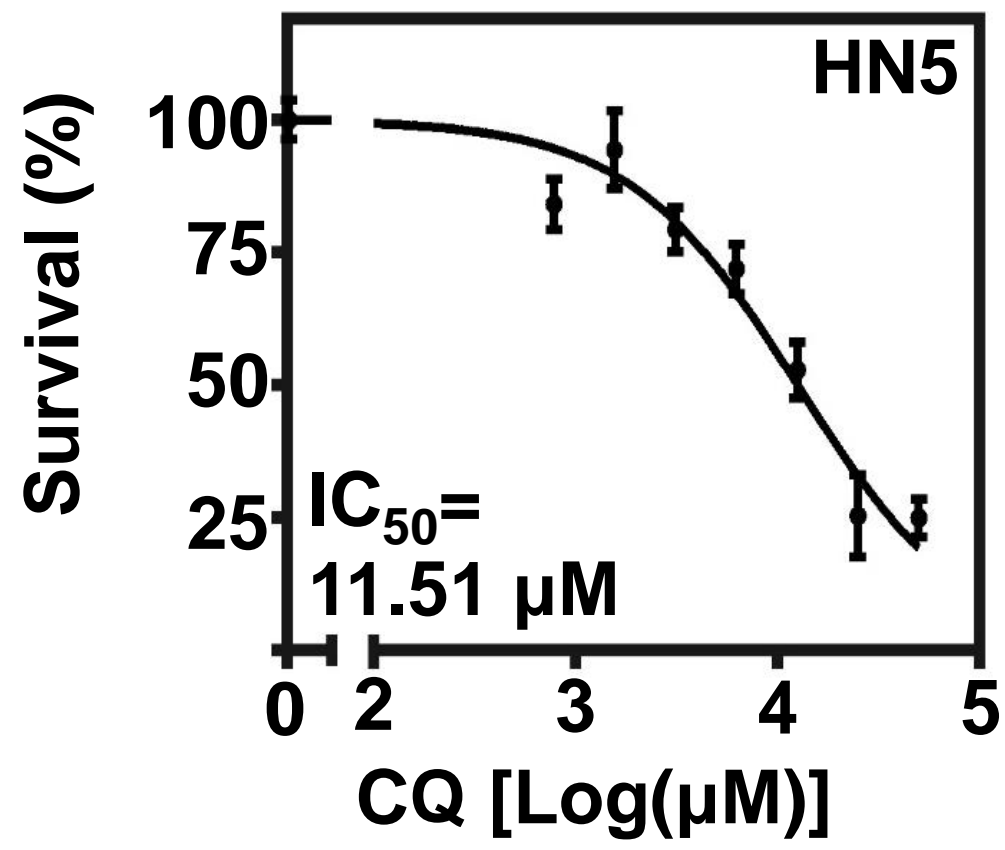

**B**

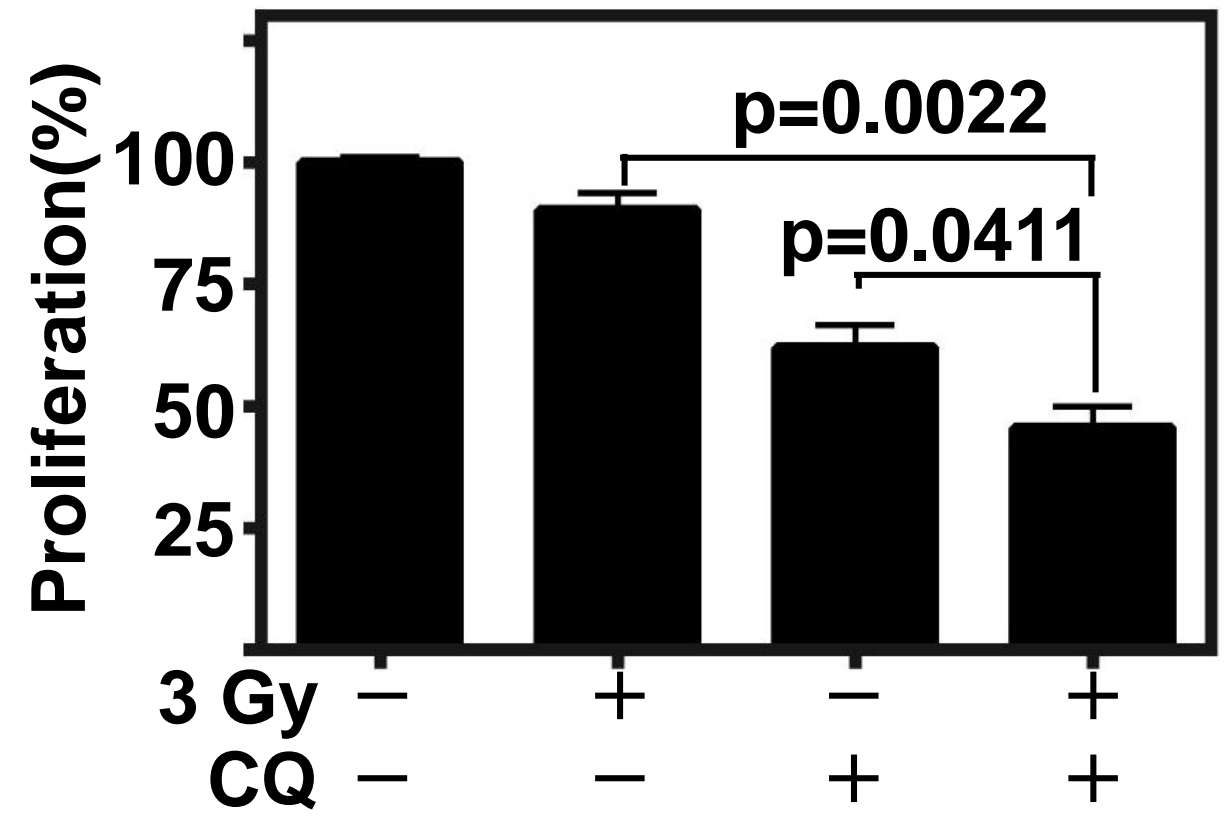

**C**

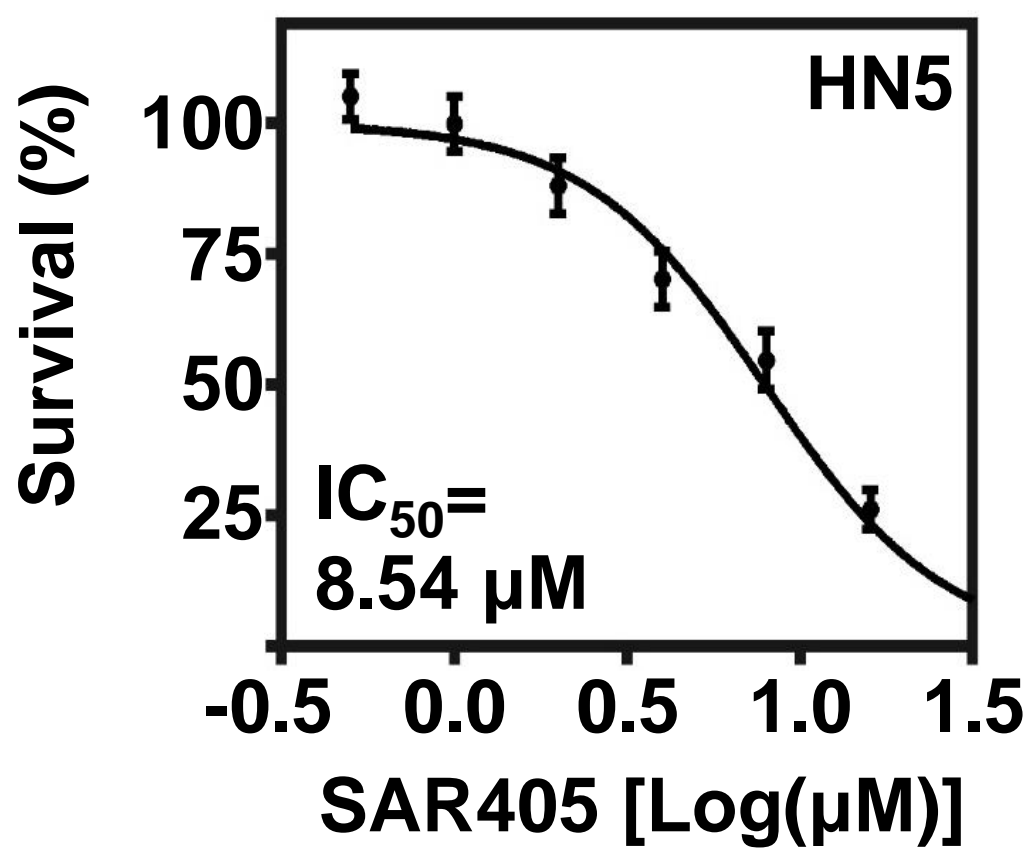

**D**

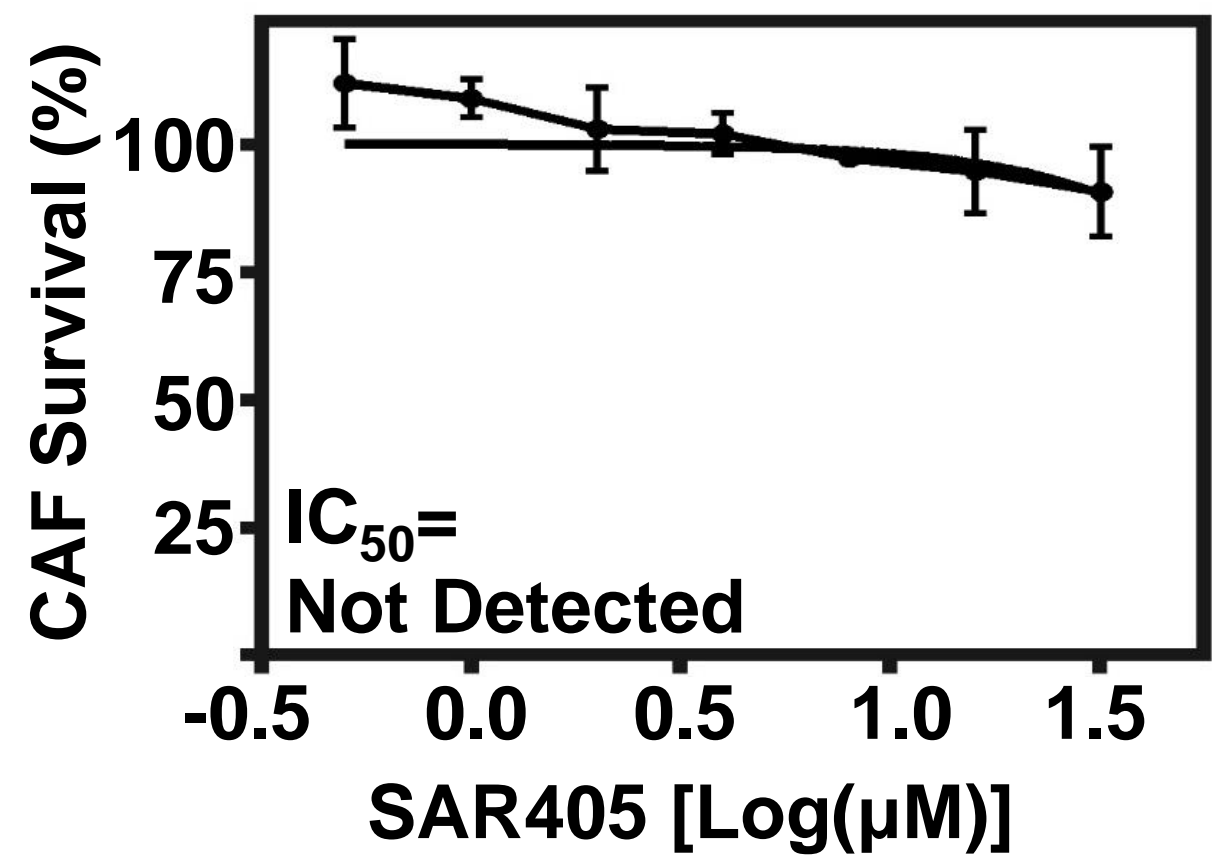

**E**

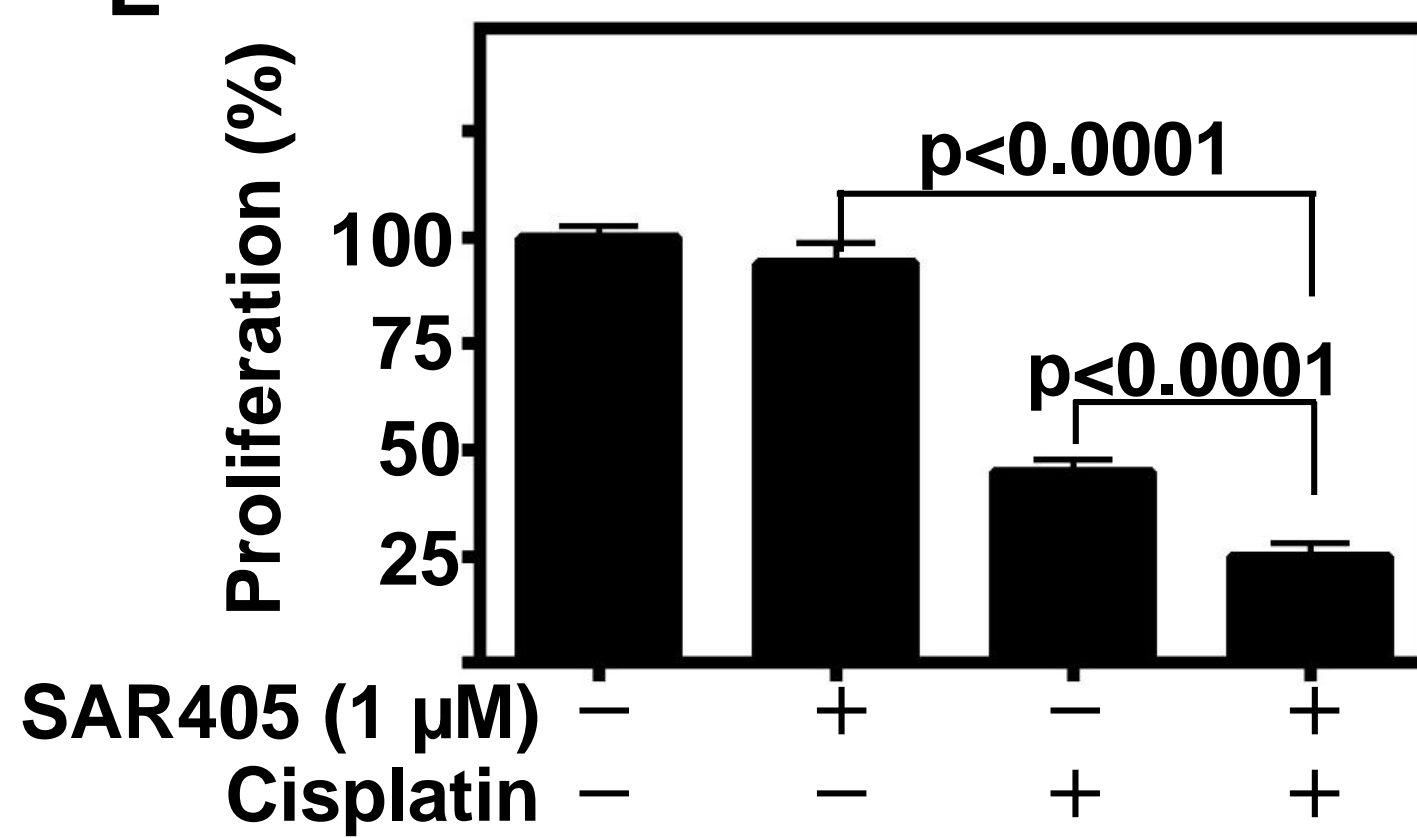

Supplement: NIHMS910161-supplement-6.pdf [file NIHMS910161-supplement-6.pdf]

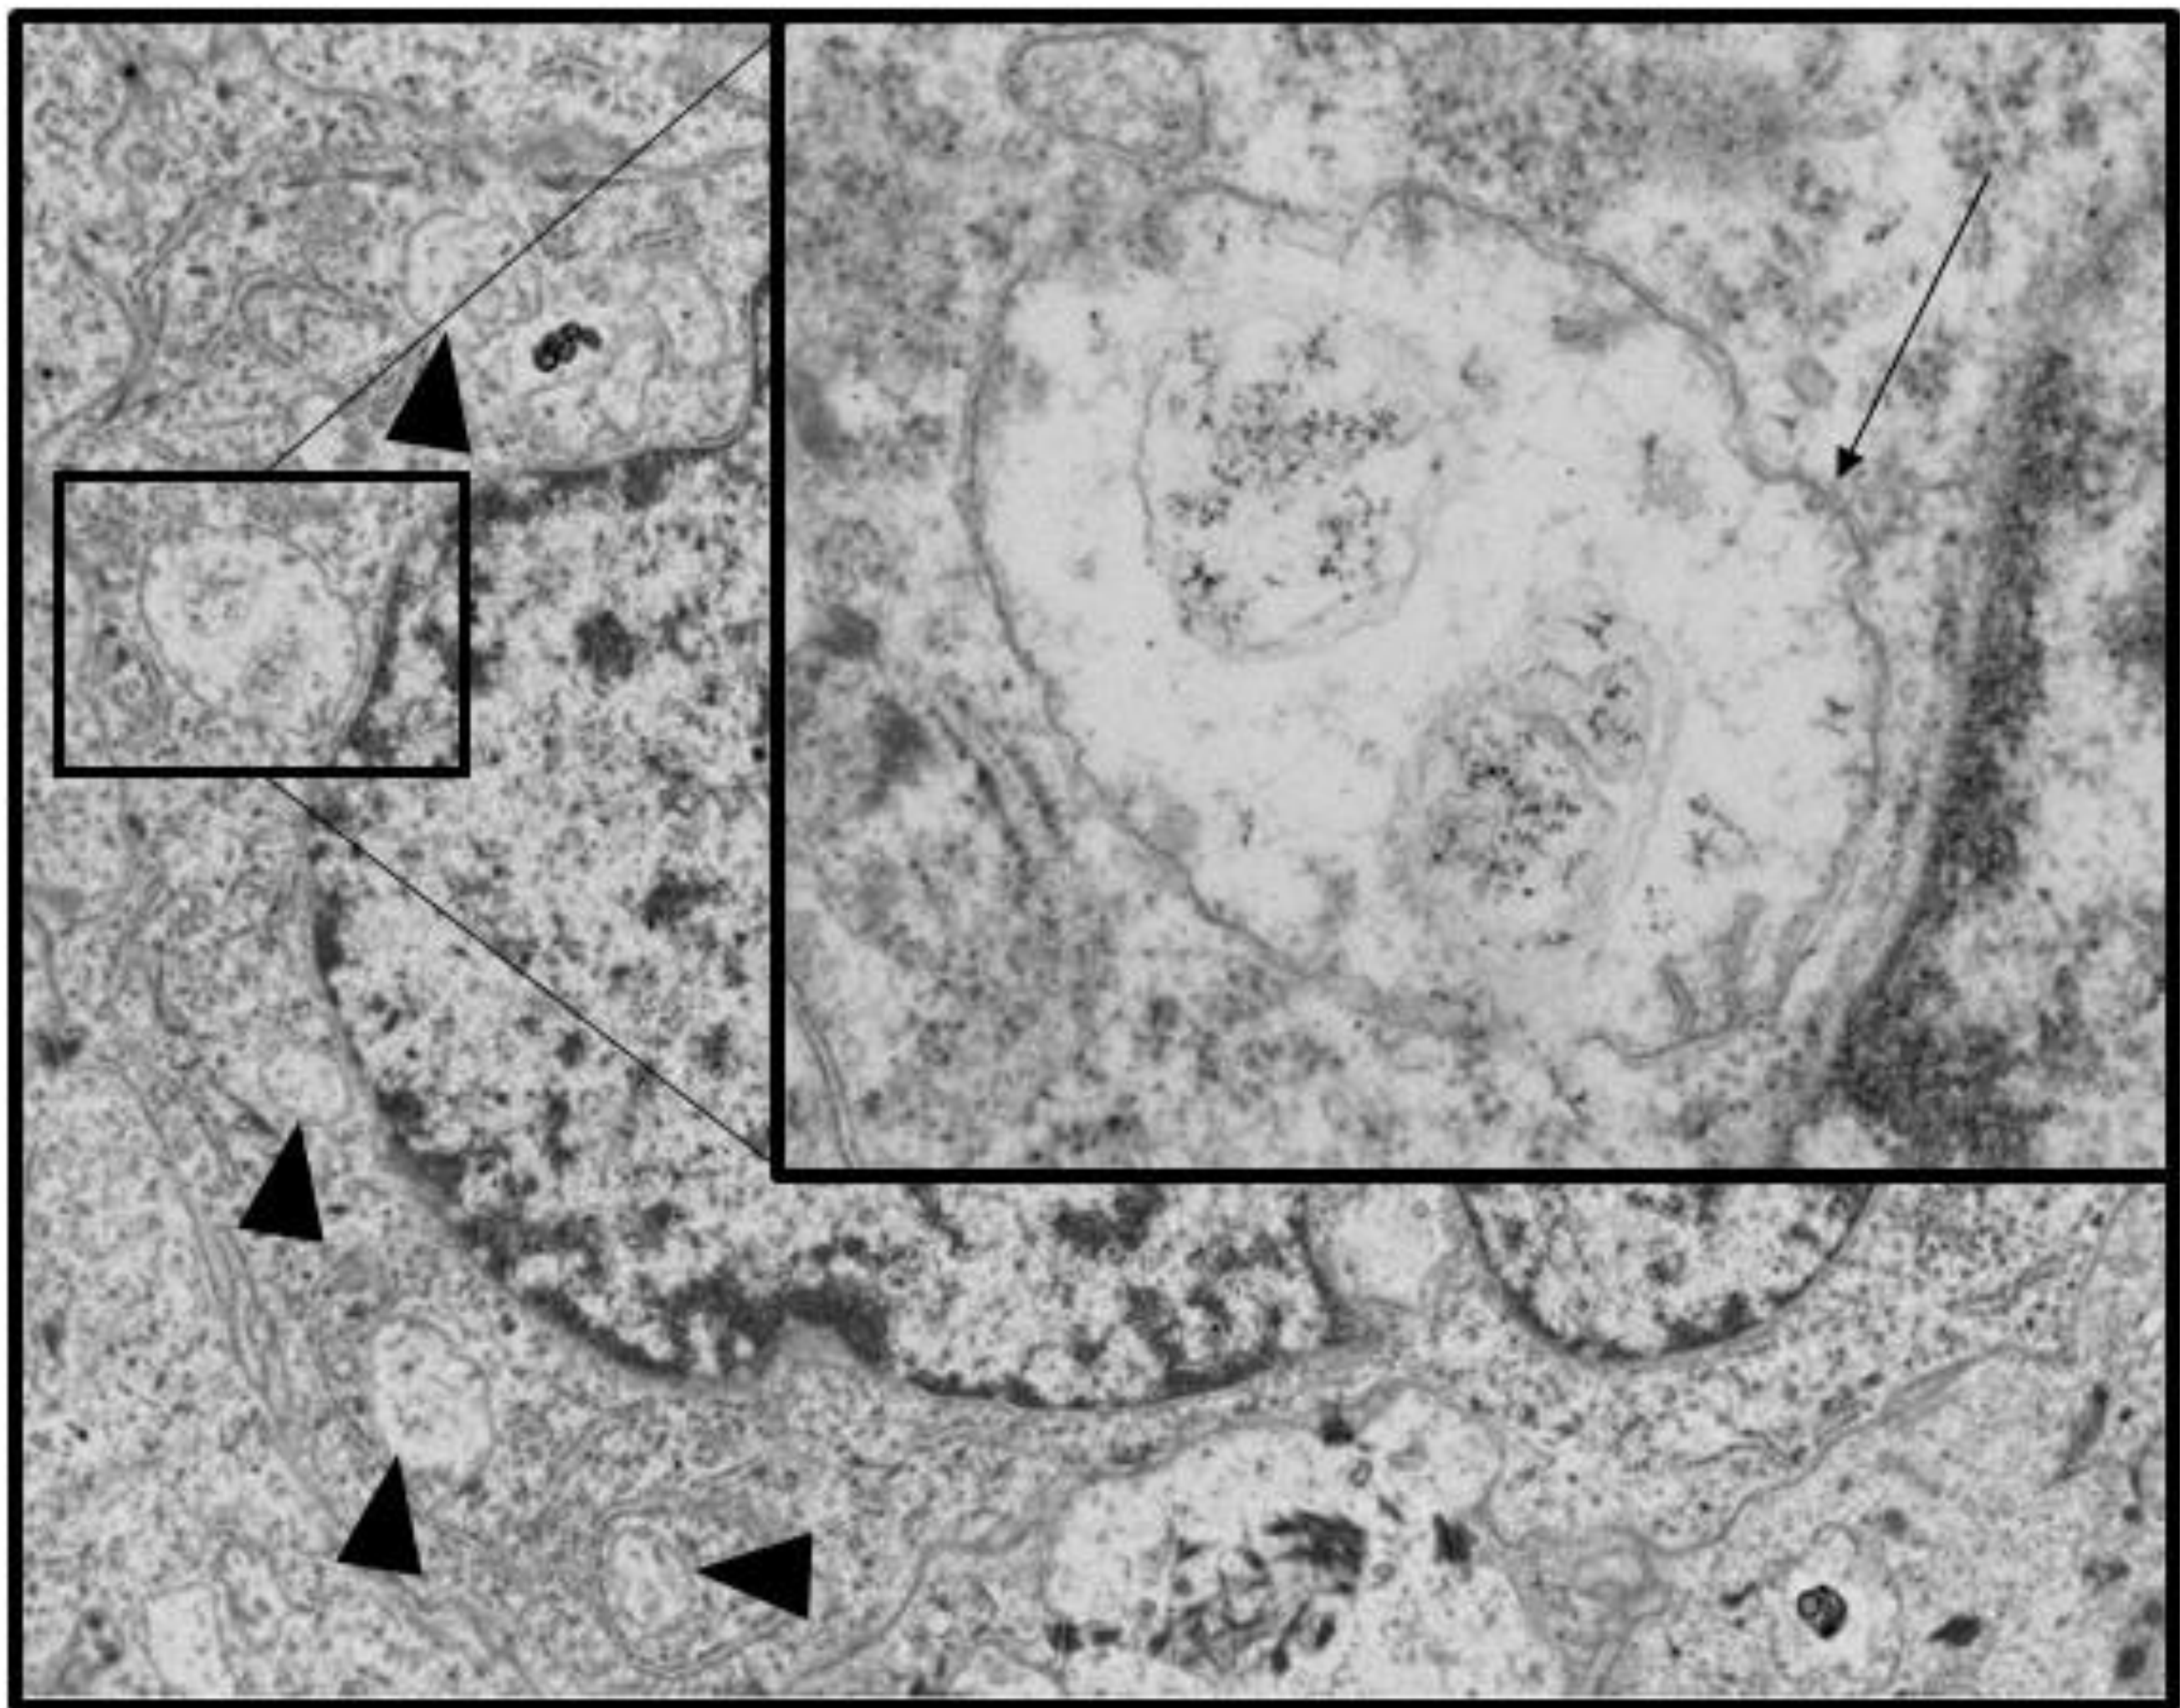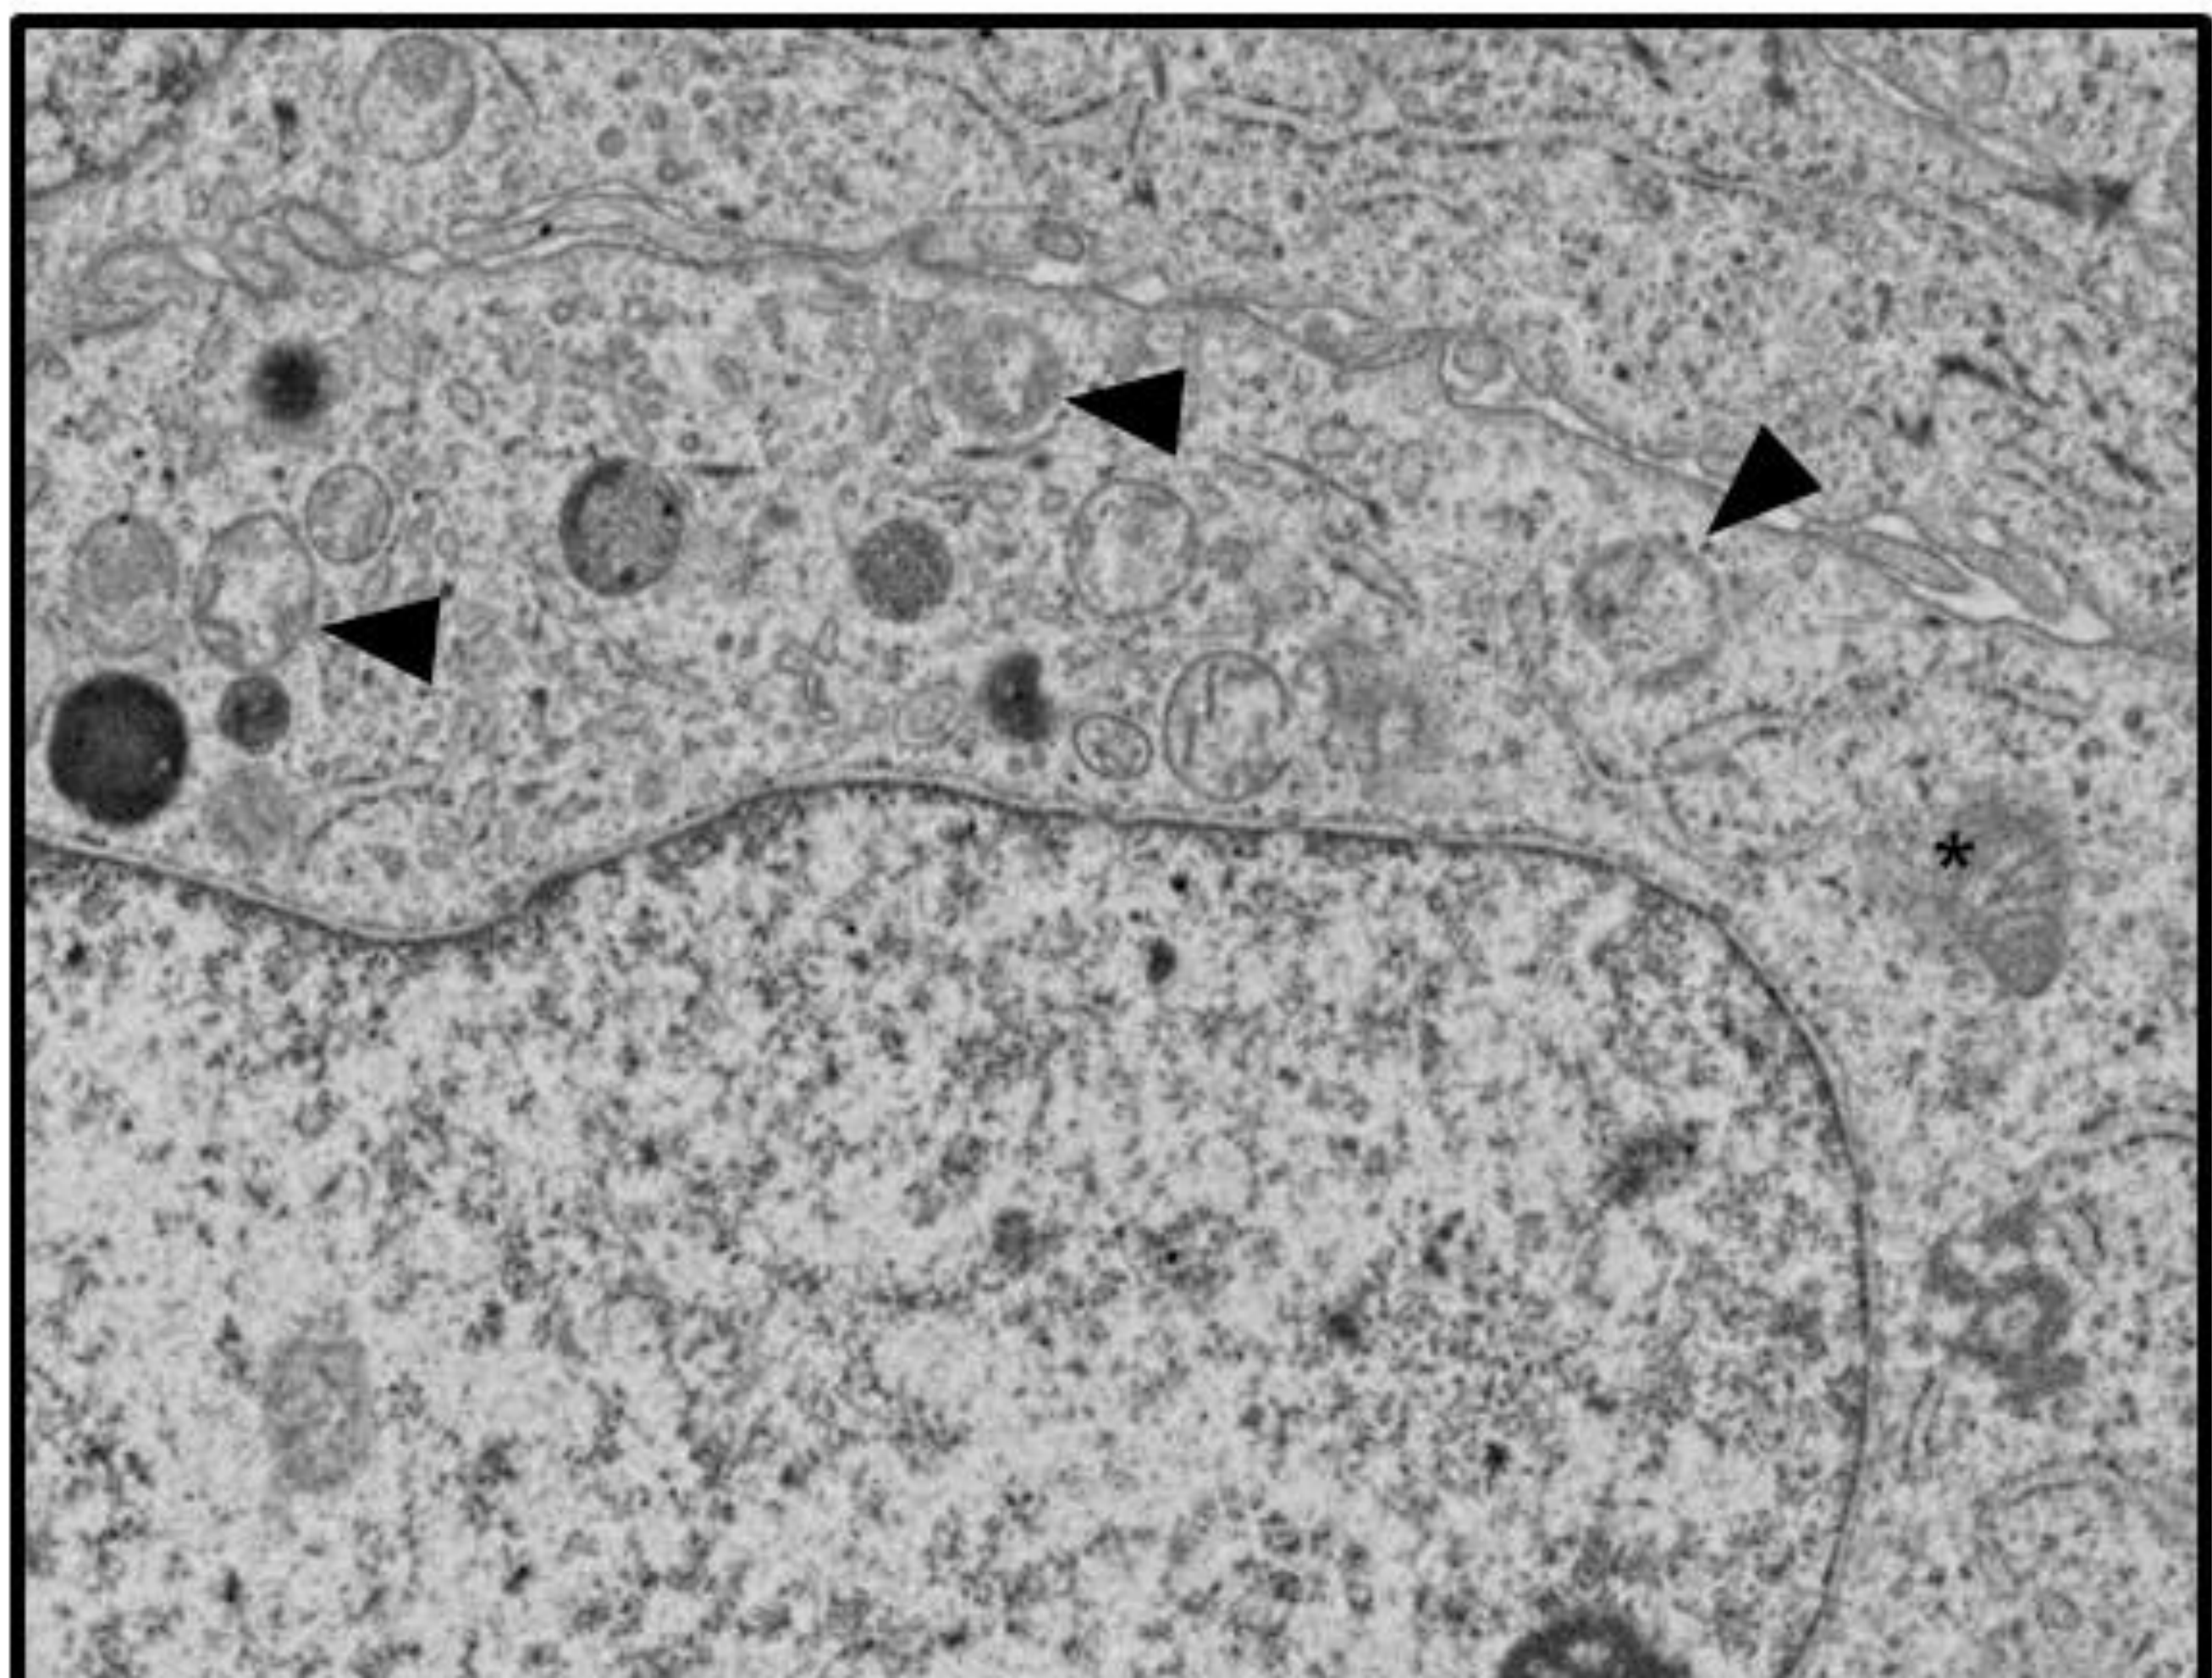

Supplement: NIHMS910161-supplement-7.pdf [file NIHMS910161-supplement-7.pdf]
